# Supplementary material for: Thermal and Electrochemical Properties of Ionic Liquids Bearing Allyl Group with Sulfonate-Based Anions—Application Potential in Epoxy Resin Curing Process
Source: MDPI journal article supplement (doi:10.3390/molecules28020709), 2023-01-10
Supplement: s1 [file s1]

## Supplementary Materials

# Thermal and Electrochemical Properties of Ionic Liquids Bearing Allyl Group with Sulfonate-Based Anions—Application Potential in Epoxy Resin Curing Process

Andrea Szpecht <sup>1,\*</sup>, Dawid Zielinski <sup>1,2</sup>, Maciej Galinski <sup>3</sup> and Marcin Smiglak <sup>1</sup>

<sup>1</sup> Poznan Science and Technology Park, Adam Mickiewicz University Foundation, 61-612 Poznań, Poland

<sup>2</sup> Faculty of Chemistry, Adam Mickiewicz University, 61-614 Poznań, Poland

<sup>3</sup> Institute of Chemistry and Technical Electrochemistry, Poznan University of Technology, 60-965 Poznań, Poland

\* Correspondence: andrea.szpecht@ppnt.poznan.pl

This document includes the synthetic procedure for compounds **1-4** from the manuscript. According to the synthetic procedure in the paper previously published by us [1], the following compounds were obtained:

**S1** - 1-Allyl-3-methylimidazolium methylsulfate (**1**)

**S2** - 1-Allyl-3-methylimidazolium methanesulfonate (**2**)

**S3** - 1-Allyl-3-methylimidazolium triflate (**3**)

**S4** - 1-Allyl-3-methylimidazolium tosylate (**4**)

## S1 - 1-Allyl-3-methylimidazolium methylsulfate (1)

Yellow liquid; yield: 99%; purity: 98.4%.

$^1\text{H}$  NMR (400 MHz,  $\text{DMSO-}d_6$ ):  $\delta$  = 9.11 (s, 1H), 7.73 (dt,  $^3J$  = 7.6 Hz,  $^3J$  = 1.8 Hz, 2H), 6.05 (ddt,  $^3J$  = 16.3 Hz,  $^3J$  = 10.3 Hz,  $^3J$  = 6.0 Hz, 1H), 5.32 (ddd,  $^3J$  = 6.7 Hz,  $^3J$  = 4.1 Hz,  $^3J$  = 1.3 Hz, 2H), 4.85 (d,  $^3J$  = 6.0 Hz, 2H), 3.88 (s,  $^3J$  = 7.4 Hz, 3H), 3.41 (s, 3H).

$^{13}\text{C}$   $\{^1\text{H}\}$  NMR (100 MHz,  $\text{DMSO-}d_6$ ):  $\delta$  = 137.35, 132.23, 124.23, 122.77, 120.66, 53.43, 51.20, 36.13.

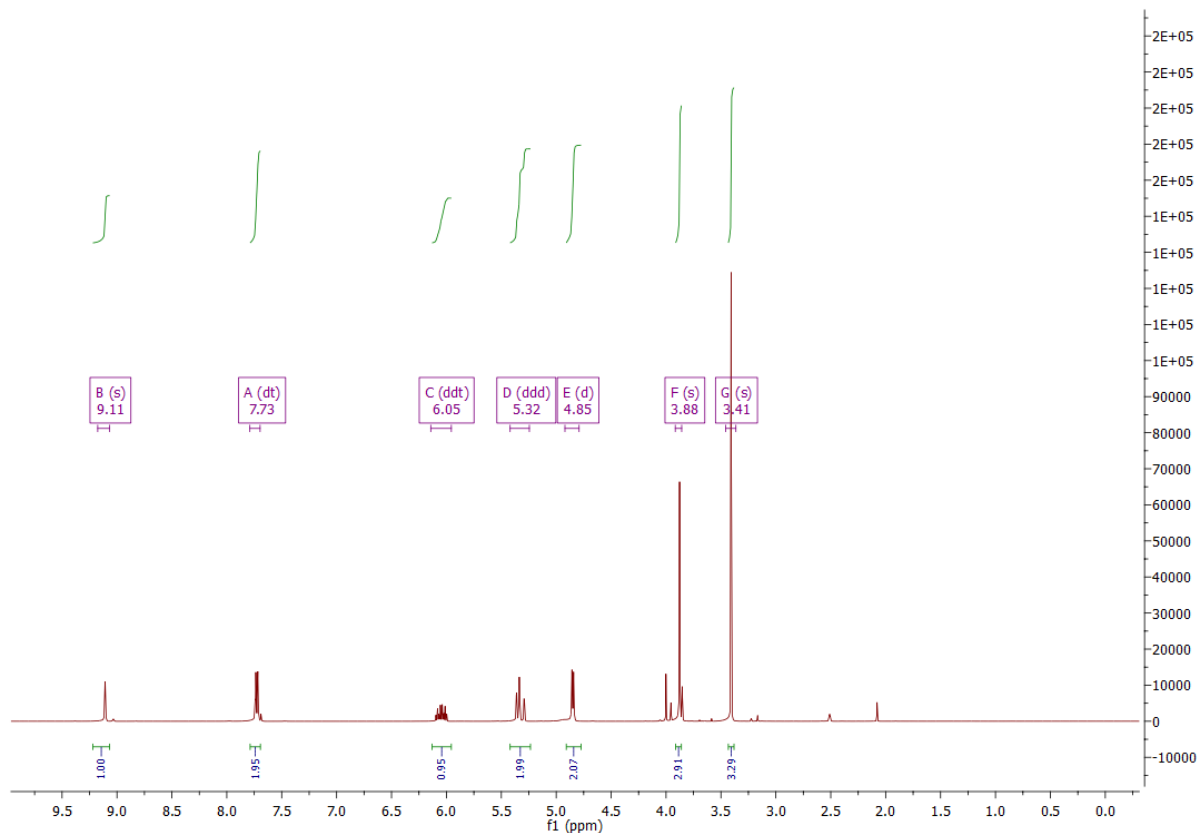

Figure S1a.  $^1\text{H}$  NMR (400 MHz,  $\text{DMSO-}d_6$ ) of **1**.

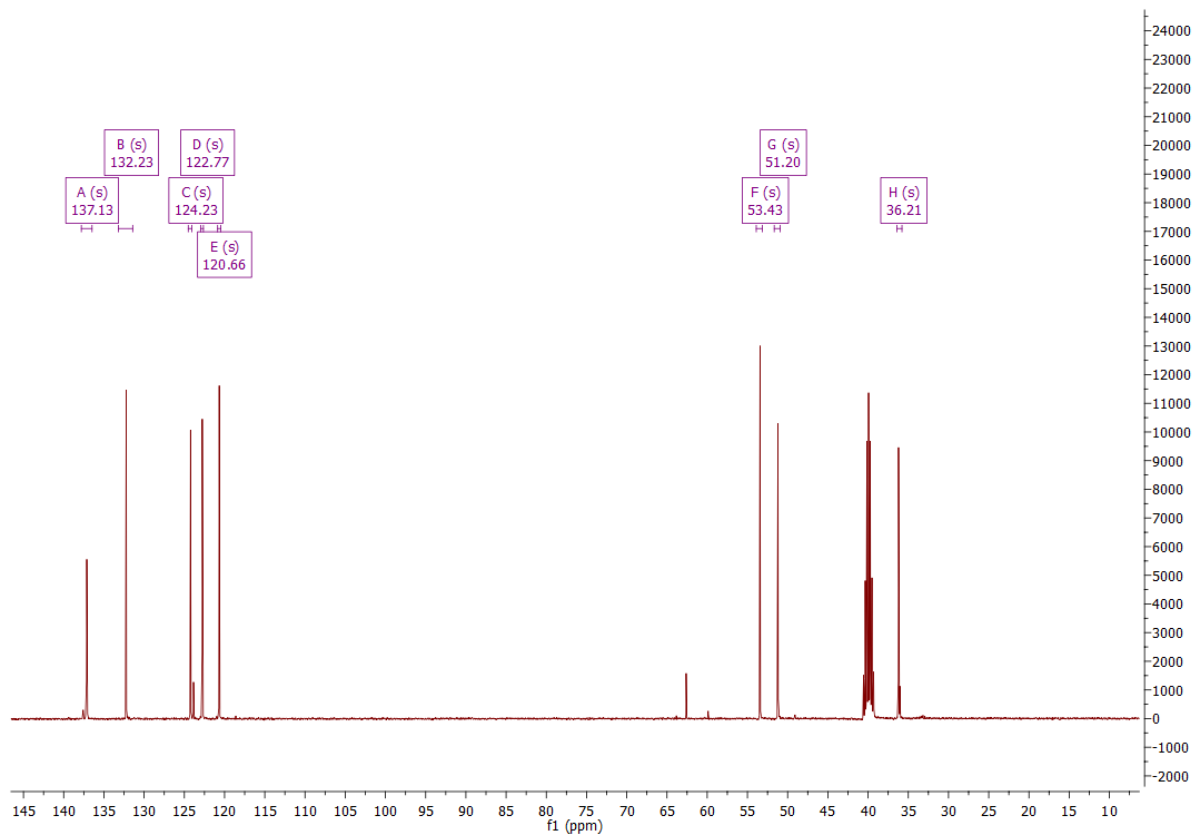

Figure S1b.  $^{13}\text{C}$   $\{^1\text{H}\}$  NMR (100 MHz,  $\text{DMSO-}d_6$ ) of **1**.

## S2 - 1-Allyl-3-methylimidazolium methanesulfonate (2)

Yellow liquid; yield: 99.2%; purity: 99.3%.

$^1\text{H}$  NMR (400 MHz,  $\text{CDCl}_3$ ):  $\delta$  = 9.63 (s, 1H), 7.52 (s, 1H), 7.37 (s, 1H), 5.90 (ddt,  $^3J$  = 16.5 Hz,  $^3J$  = 10.2 Hz,  $^3J$  = 6.3 Hz, 1H), 5.31 (t,  $^3J$  = 13.3 Hz, 2H), 4.79 (d,  $^3J$  = 6.2 Hz, 2H), 3.91 (s, 3H), 2.61 (s, 3H).

$^{13}\text{C}$   $\{^1\text{H}\}$  NMR (100 MHz,  $\text{CDCl}_3$ ):  $\delta$  = 137.63, 130.22, 123.75, 122.02, 121.97, 51.66, 36.29.

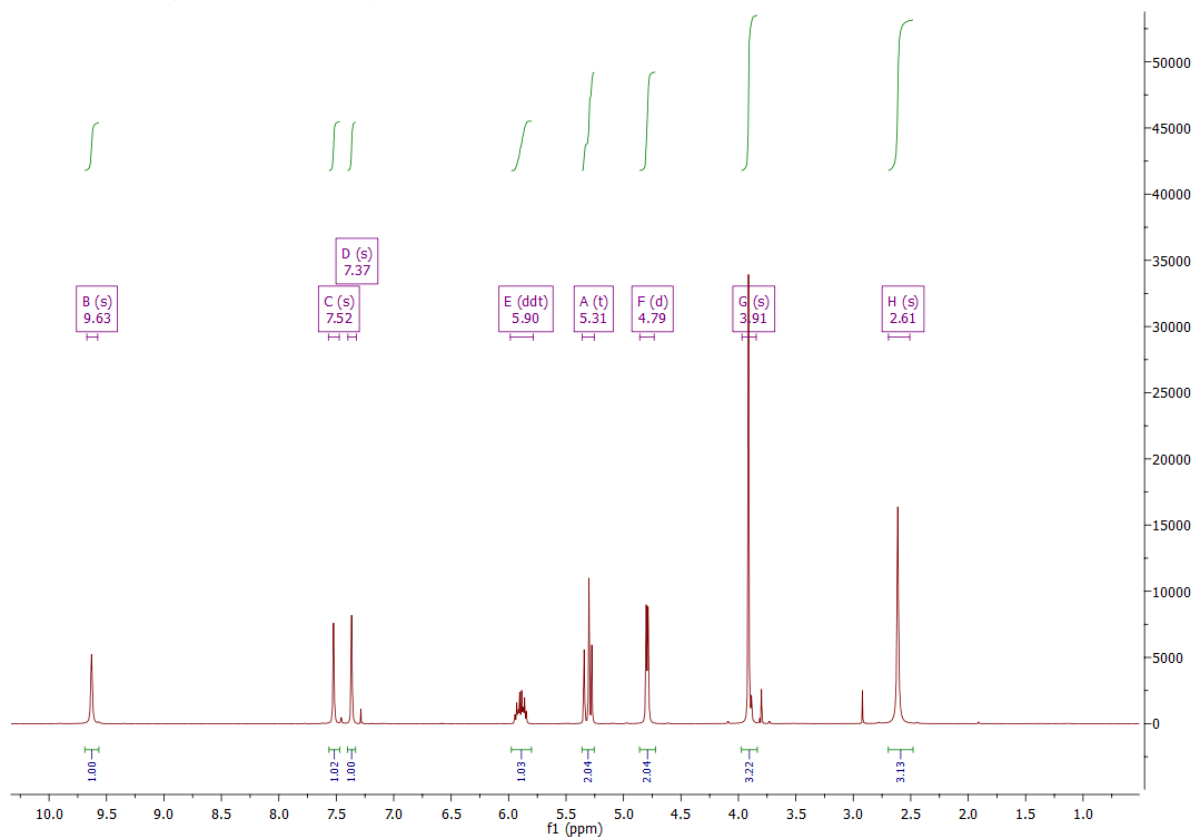

Figure S2a.  $^1\text{H}$  NMR (400 MHz,  $\text{CDCl}_3$ ) of 2.

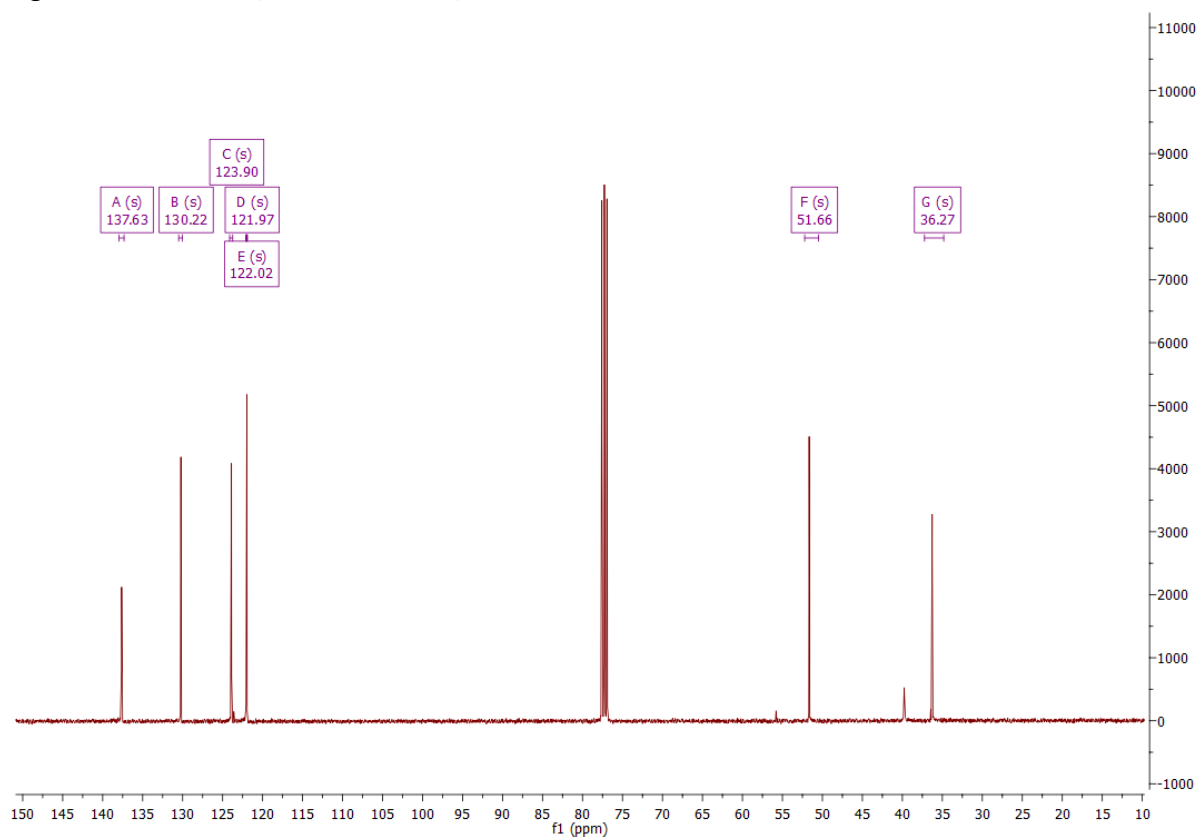

Figure S2b.  $^{13}\text{C}$   $\{^1\text{H}\}$  NMR (100 MHz,  $\text{CDCl}_3$ ) of 2.

### S3 - 1-Allyl-3-methylimidazolium triflate (**3**)

Yellow liquid; yield: 99.5%; purity: 99.5%.

$^1\text{H}$  NMR (400 MHz,  $\text{DMSO-}d_6$ ):  $\delta$  = 9.06 (s, 1H), 7.69 (dt,  $^3J$  = 7.2 Hz,  $^3J$  = 1.7 Hz, 2H), 6.03 (ddt,  $^3J$  = 16.3 Hz,  $^3J$  = 10.3 Hz,  $^3J$  = 6.0 Hz, 1H), 5.35 (dt,  $^3J$  = 5.0 Hz,  $^3J$  = 2.5 Hz, 1H), 5.30 (dd,  $^3J$  = 17.1 Hz,  $^3J$  = 1.3 Hz, 1H), 4.83 (d,  $^3J$  = 6.0 Hz, 2H), 3.86 (s, 3H)

$^{19}\text{F}$  NMR (376 MHz,  $\text{DMSO-}d_6$ ):  $\delta$  = -77.87

$^{13}\text{C}$   $\{^1\text{H}\}$  NMR (100 MHz,  $\text{DMSO-}d_6$ ):  $\delta$  = 137.04, 132.06, 124.19, 122.72, 121.10 (q,  $^3J$  = 322.1 Hz), 120.64, 51.24, 36.0.

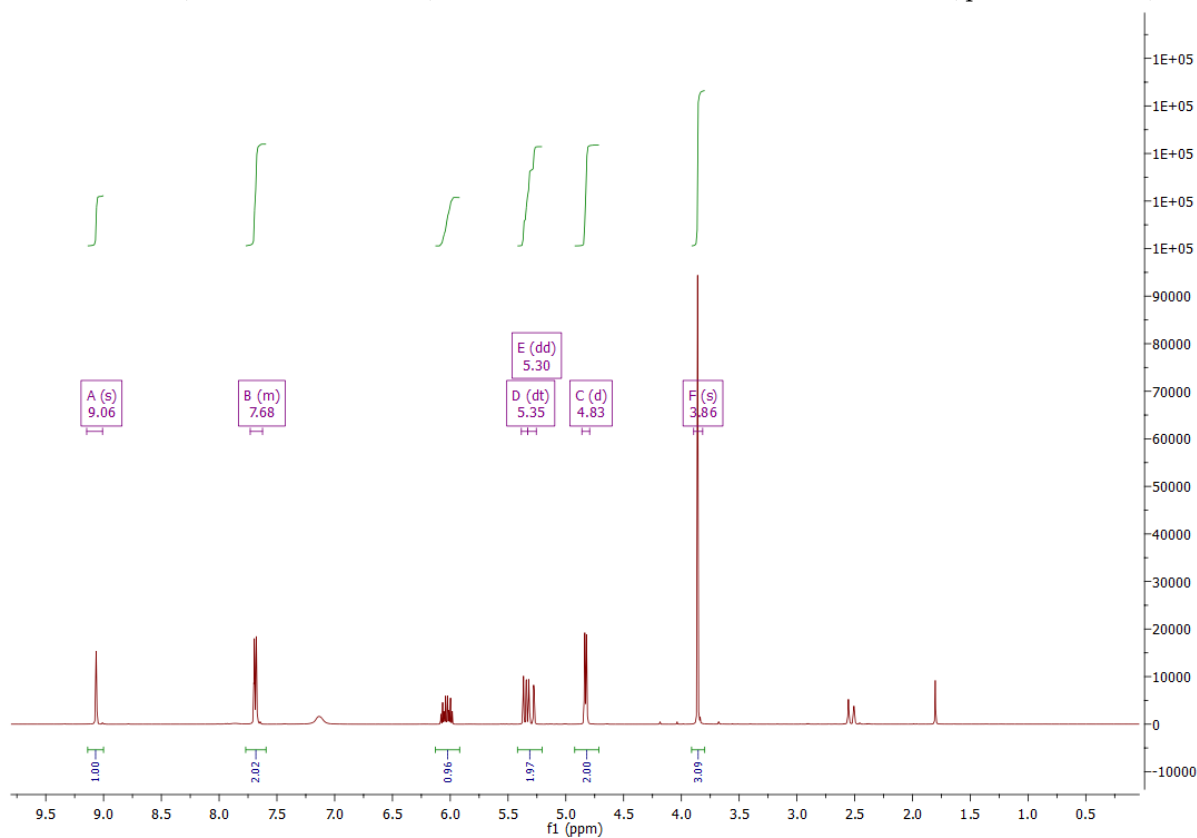

Figure S3a.  $^1\text{H}$  NMR (400 MHz,  $\text{DMSO-}d_6$ ) of **3**.

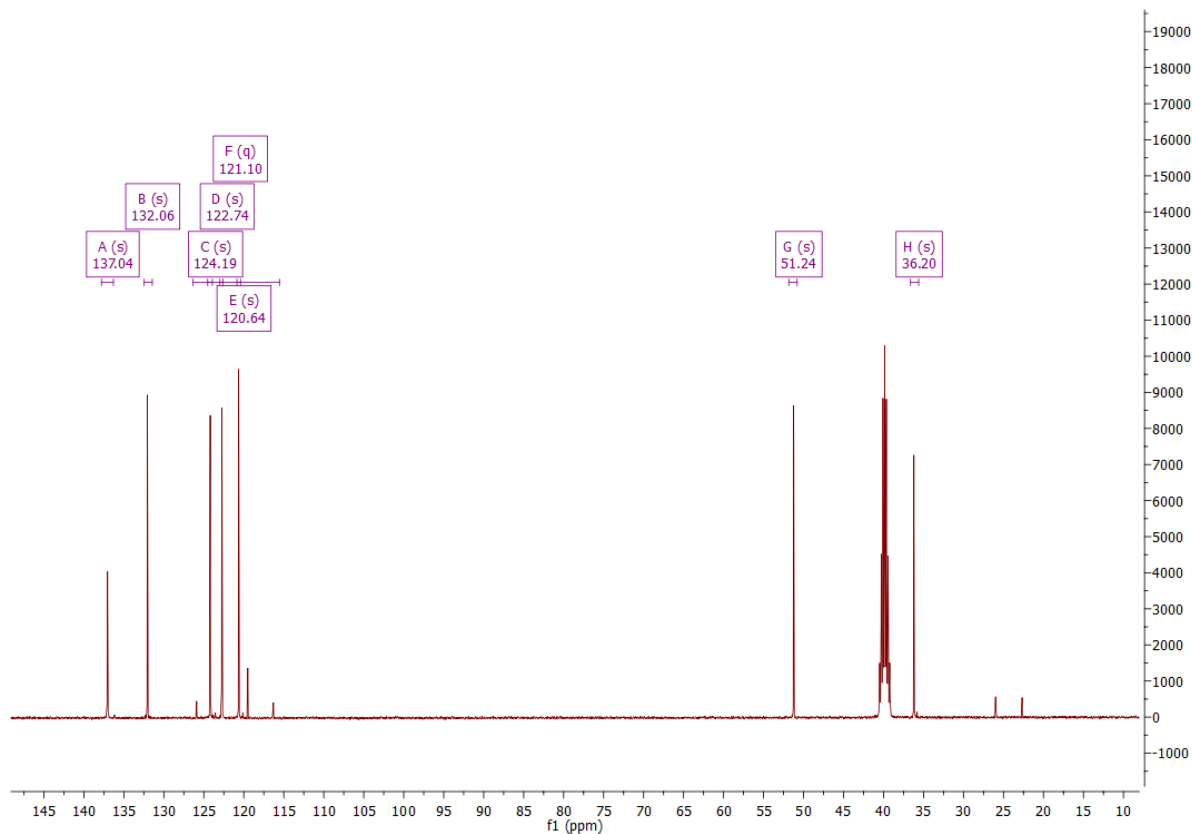

Figure S3b.  $^{13}\text{C}$   $\{^1\text{H}\}$  NMR (100 MHz,  $\text{DMSO-}d_6$ ) of **3**.

### S4 - 1-Allyl-3-methylimidazolium tosylate (**4**)

Yellow liquid; yield: 99.1%; purity: 99.2%.

$^1\text{H}$  NMR (400 MHz,  $\text{CDCl}_3$ ):  $\delta$  = 9.50 (s, 1H), 7.66 (d,  $^3J$  = 7.5 Hz, 2H), 7.46 (s, 1H), 7.29 (s, 1H), 7.07 (d,  $^3J$  = 7.3 Hz, 2H), 5.82 (ddt,  $^3J$  = 16.5 Hz,  $^3J$  = 10.2 Hz,  $^3J$  = 6.3 Hz, 1H), 5.25 (dd,  $^3J$  = 13.6 Hz,  $^3J$  = 7.2 Hz, 2H), 4.69 (d,  $^3J$  = 6.2 Hz, 2H), 3.81 (s, 3H), 2.27 (s, 3H).

$^{13}\text{C}$   $\{^1\text{H}\}$  NMR (100 MHz,  $\text{CDCl}_3$ ):  $\delta$  = 139.39, 137.34, 130.18, 128.66, 125.70, 123.92, 121.98, 121.90, 51.61, 36.20, 21.22.

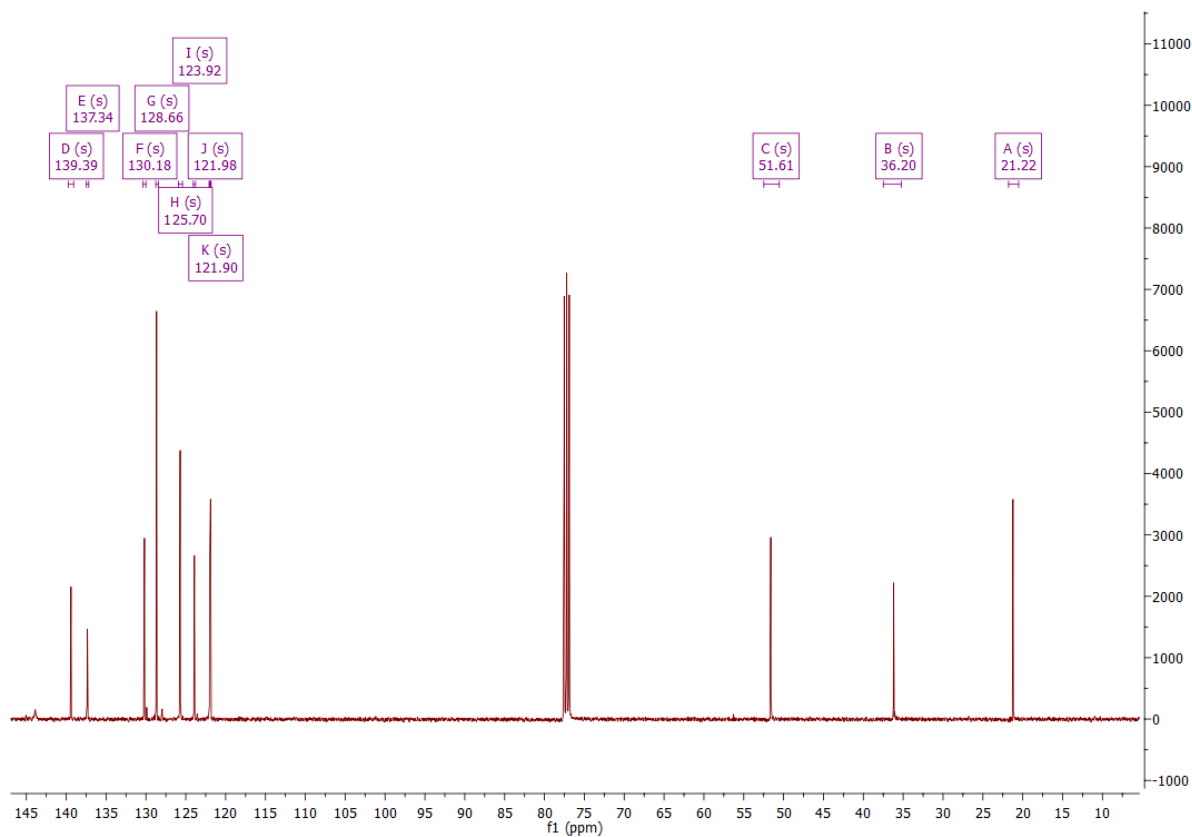

Figure S4a.  $^1\text{H}$  NMR (400 MHz,  $\text{CDCl}_3$ ) of **4**.

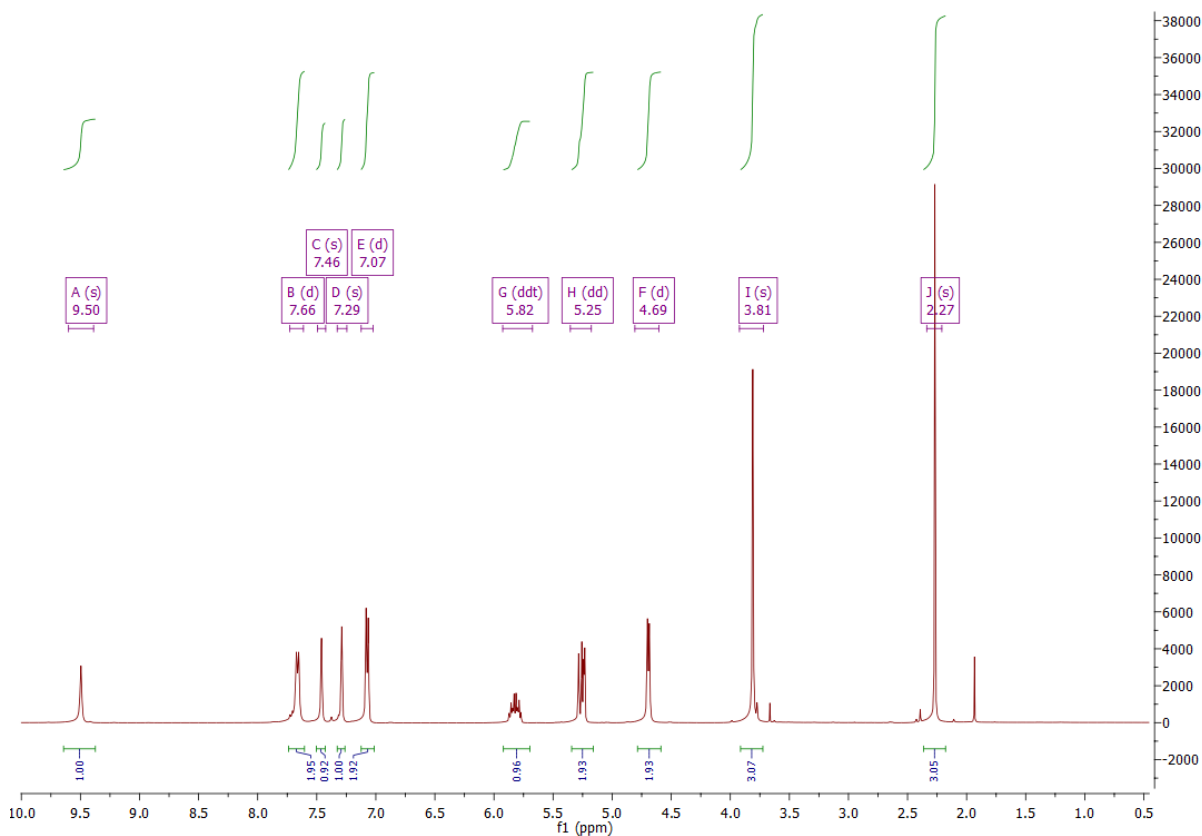

Figure S4b.  $^{13}\text{C}$   $\{^1\text{H}\}$  NMR (100 MHz,  $\text{CDCl}_3$ ) of **4**.

## References

1. Szpecht, A.; Zajac, A.; Zielinski, D.; Maciejewski, H.; Smiglak, M. Versatile Method for the Simultaneous Synthesis of Two Ionic Liquids, Otherwise Difficult to Obtain, with High Atom Economy. *ChemistryOpen* **2019**, *8*, 972–983, doi:10.1002/open.201900217.
